# Supplementary material for: Outdoor Activities Associated with Lower Odds of SARS-CoV-2 Acquisition: A Case–Control Study
Source: MDPI journal article supplement (doi:10.3390/ijerph19106126), 2022-05-18
Supplement: s1 [file s1]

## Supplementary Tables

**Table S1: Study Questionnaire – Selected Relevant Questions**

|                                                                             |                                                                                                                                                                                                                              |                   |
|-----------------------------------------------------------------------------|------------------------------------------------------------------------------------------------------------------------------------------------------------------------------------------------------------------------------|-------------------|
| In the two weeks prior to testing, did you ever:<br>(Select all that apply) | Visit an indoor gym or attend an indoor fitness class                                                                                                                                                                        |                   |
|                                                                             | Engage in any organized sports or recreation in an indoor setting. Examples of sports include: badminton, bowling, dancing, ice skating, physical training, tennis, track and field, basketball, martial arts, and wrestling |                   |
|                                                                             | Engage in any organized sports in an outdoor setting (including an outdoor gym or outdoor fitness class)                                                                                                                     |                   |
|                                                                             | Engage in any recreation in an outdoor setting (including running, hiking, biking or other)                                                                                                                                  |                   |
|                                                                             | Swim at a public swimming pool or marina                                                                                                                                                                                     |                   |
|                                                                             | Go to a public playground                                                                                                                                                                                                    |                   |
|                                                                             | Go to an outdoor park or beach                                                                                                                                                                                               |                   |
| Specific sports questions:                                                  | Did you play frisbee indoors or outdoors?                                                                                                                                                                                    | Indoors           |
|                                                                             |                                                                                                                                                                                                                              | Outdoors          |
|                                                                             |                                                                                                                                                                                                                              | Decline to answer |
|                                                                             | Did you do yoga or pilates indoors or outdoors?                                                                                                                                                                              | Indoors           |
|                                                                             |                                                                                                                                                                                                                              | Outdoors          |
|                                                                             |                                                                                                                                                                                                                              | Decline to answer |
|                                                                             | Did you do Zumba indoors or outdoors?                                                                                                                                                                                        | Indoors           |
|                                                                             |                                                                                                                                                                                                                              | Outdoors          |
|                                                                             |                                                                                                                                                                                                                              | Decline to answer |
|                                                                             | Did you do HIIT indoors or outdoors?                                                                                                                                                                                         | Indoors           |
|                                                                             |                                                                                                                                                                                                                              | Outdoors          |
|                                                                             |                                                                                                                                                                                                                              | Decline to answer |
|                                                                             | Did you do bocce ball/lawn bowling/bowling indoors or outdoors?                                                                                                                                                              | Indoors           |
|                                                                             |                                                                                                                                                                                                                              | Outdoors          |
|                                                                             |                                                                                                                                                                                                                              | Decline to answer |
|                                                                             | Did you walk, run, or hike indoors or outdoors?                                                                                                                                                                              | Indoors           |
|                                                                             |                                                                                                                                                                                                                              | Outdoors          |
|                                                                             |                                                                                                                                                                                                                              | Decline to answer |
|                                                                             | Did you do stationary cycling indoors or outdoors?                                                                                                                                                                           | Indoors           |
|                                                                             |                                                                                                                                                                                                                              | Outdoors          |
|                                                                             |                                                                                                                                                                                                                              | Decline to answer |
|                                                                             | Did you swim indoors or outdoors?                                                                                                                                                                                            | Indoors           |
|                                                                             |                                                                                                                                                                                                                              | Outdoors          |
|                                                                             |                                                                                                                                                                                                                              | Decline to answer |
|                                                                             | Did you play badminton indoors or outdoors?                                                                                                                                                                                  | Indoors           |
|                                                                             |                                                                                                                                                                                                                              | Outdoors          |
|                                                                             |                                                                                                                                                                                                                              | Decline to answer |

|  |                                                      |                   |
|--|------------------------------------------------------|-------------------|
|  | Did you play no contact dancing indoors or outdoors? | Indoors           |
|  |                                                      | Outdoors          |
|  |                                                      | Decline to answer |
|  | Did you partner dance indoors or outdoors?           | Indoors           |
|  |                                                      | Outdoors          |
|  |                                                      | Decline to answer |
|  | Did you do physical training indoors or outdoors?    | Indoors           |
|  |                                                      | Outdoors          |
|  |                                                      | Decline to answer |
|  | Did you play singles tennis indoors or outdoors?     | Indoors           |
|  |                                                      | Outdoors          |
|  |                                                      | Decline to answer |
|  | Did you play doubles tennis indoors or outdoors?     | Indoors           |
|  |                                                      | Outdoors          |
|  |                                                      | Decline to answer |
|  | Did you play golf indoors or outdoors?               | Indoors           |
|  |                                                      | Outdoors          |
|  |                                                      | Decline to answer |
|  | Did you play baseball/softball indoors or outdoors?  | Indoors           |
|  |                                                      | Outdoors          |
|  |                                                      | Decline to answer |
|  | Did you do cheerleading indoors or outdoors?         | Indoors           |
|  |                                                      | Outdoors          |
|  |                                                      | Decline to answer |
|  | Did you play dodgeball indoors or outdoors?          | Indoors           |
|  |                                                      | Outdoors          |
|  |                                                      | Decline to answer |
|  | Did you play field hockey indoors or outdoors?       | Indoors           |
|  |                                                      | Outdoors          |
|  |                                                      | Decline to answer |
|  | Did you do gymnastics indoors or outdoors?           | Indoors           |
|  |                                                      | Outdoors          |
|  |                                                      | Decline to answer |
|  | Did you play kickball indoors or outdoors?           | Indoors           |
|  |                                                      | Outdoors          |
|  |                                                      | Decline to answer |
|  | Did you play soccer indoors or outdoors?             | Indoors           |
|  |                                                      | Outdoors          |
|  |                                                      | Decline to answer |
|  | Did you play football indoors or outdoors?           | Indoors           |
|  |                                                      | Outdoors          |
|  |                                                      | Decline to answer |
|  | Did you play basketball indoors or outdoors?         | Indoors           |
|  |                                                      | Outdoors          |
|  |                                                      | Decline to answer |

|  |                                                      |                   |
|--|------------------------------------------------------|-------------------|
|  | Did you play ice hockey indoors or outdoors?         | Indoors           |
|  |                                                      | Outdoors          |
|  |                                                      | Decline to answer |
|  | Did you do martial arts indoors or outdoors?         | Indoors           |
|  |                                                      | Outdoors          |
|  |                                                      | Decline to answer |
|  | Did you play water polo indoors or outdoors?         | Indoors           |
|  |                                                      | Outdoors          |
|  |                                                      | Decline to answer |
|  | Did you row/crew indoors or outdoors?                | Indoors           |
|  |                                                      | Outdoors          |
|  |                                                      | Decline to answer |
|  | Did you wrestle indoors or outdoors?                 | Indoors           |
|  |                                                      | Outdoors          |
|  |                                                      | Decline to answer |
|  | Did you do (the other activity) indoors or outdoors? | Indoors           |
|  |                                                      | Outdoors          |
|  |                                                      | Decline to answer |

**Table S2.** Adjusted odds ratios for COVID-19 by sport participation and household occupancy <sup>a</sup>.

| Group                                                                  | Case         | Control      | aOR         | 95%CI             | p-value      |
|------------------------------------------------------------------------|--------------|--------------|-------------|-------------------|--------------|
| Over-occupied                                                          |              |              |             |                   |              |
| Outdoor only/Combined sport                                            | 22<br>(31.0) | 10<br>(62.5) | <b>0.19</b> | <b>0.05, 0.75</b> | <b>0.006</b> |
| No sport/Indoor only sport                                             | 49<br>(69.0) | 6 (37.5)     | ref         |                   |              |
| Balanced/Under-occupied                                                |              |              |             |                   |              |
| Outdoor only/Combined sport                                            | 27<br>(40.9) | 14<br>(77.8) | <b>0.12</b> | <b>0.03, 0.55</b> | <b>0.02</b>  |
| No sport/Indoor only sport                                             | 39<br>(59.1) | 4 (22.2)     | ref         |                   |              |
| household occupancy and sport participation interaction p-value = 0.66 |              |              |             |                   |              |

Abbreviations: aOR, adjusted odds ratio; CI, confidence interval.

<sup>a</sup> Model included household occupancy, sport participation, sport by household occupancy interaction term,

ZIP code median per capita income, age and race/ethnicity

**Table S3.** Adjusted odds ratios for COVID-19 by outdoor park use and household occupancy <sup>a</sup>.

| Group            | Case         | Control  | aOR  | 95%CI      | p-value |
|------------------|--------------|----------|------|------------|---------|
| Over-occupied    |              |          |      |            |         |
| Outdoor park use | 23<br>(32.9) | 9 (52.9) | 0.35 | 0.10, 1.21 | 0.10    |

|                                                                     |              |              |             |                       |             |
|---------------------------------------------------------------------|--------------|--------------|-------------|-----------------------|-------------|
| No outdoor park use                                                 | 47<br>(67.1) | 8 (47.1)     | ref         |                       |             |
| Balanced/Under-occupied<br>Outdoor park use                         | 29<br>(43.3) | 12<br>(66.7) | <b>0.22</b> | <b>0.06,<br/>0.82</b> | <b>0.02</b> |
| No outdoor park use                                                 | 38<br>(56.7) | 6 (33.3)     | ref         |                       |             |
| household occupancy and outdoor park use interaction p-value = 0.61 |              |              |             |                       |             |

Abbreviations: aOR, adjusted odds ratio; CI, confidence interval.

<sup>a</sup> Model included household occupancy, sport participation, sport by household occupancy interaction term,

ZIP code per capita income, age and race/ethnicity

**Table S4.** Adjusted odds ratios for COVID-19 by sport participation and ZIP code median per capita income <sup>a</sup>.

| Group                                                                         | Case         | Control      | aOR         | 95%CI                 | p-value          |
|-------------------------------------------------------------------------------|--------------|--------------|-------------|-----------------------|------------------|
| Low                                                                           |              |              |             |                       |                  |
| Outdoor only/Combined sport                                                   | 18<br>(27.3) | 12<br>(70.6) | <b>0.09</b> | <b>0.02,<br/>0.37</b> | <b>&lt;0.001</b> |
| No sport/Indoor only sport                                                    | 48<br>(72.7) | 5 (29.4)     | ref         |                       |                  |
| High                                                                          |              |              |             |                       |                  |
| Outdoor only/Combined sport                                                   | 31<br>(43.7) | 12<br>(70.6) | 0.27        | 0.07,<br>1.04         | 0.06             |
| No sport/Indoor only sport                                                    | 40<br>(56.3) | 5 (29.4)     | ref         |                       |                  |
| ZIP code per capita income and sport participation interaction p-value = 0.25 |              |              |             |                       |                  |

Abbreviations: aOR, adjusted odds ratio; CI, confidence interval.

<sup>a</sup> Model included ZIP code per capita income, park use, park use by ZIP code median per capita income cross-product term, household occupancy, age and race/ethnicity

**Table S5.** Adjusted odds ratios for COVID-19 by outdoor park use and ZIP code median per capita income <sup>a</sup>.

| Group                                                                      | Case         | Control      | aOR         | 95%CI                 | p-value     |
|----------------------------------------------------------------------------|--------------|--------------|-------------|-----------------------|-------------|
| Low                                                                        |              |              |             |                       |             |
| Outdoor park use                                                           | 17<br>(25.8) | 11<br>(61.1) | <b>0.19</b> | <b>0.05,<br/>0.69</b> | <b>0.01</b> |
| No outdoor park use                                                        | 49<br>(74.2) | 7 (38.9)     | ref         |                       |             |
| High                                                                       |              |              |             |                       |             |
| Outdoor park use                                                           | 35<br>(43.7) | 10<br>(70.6) | 0.42        | 0.12,<br>1.50         | 0.18        |
| No outdoor park use                                                        | 36<br>(56.3) | 7 (29.4)     | ref         |                       |             |
| ZIP code per capita income and outdoor park use interaction p-value = 0.39 |              |              |             |                       |             |

Abbreviations: aOR, adjusted odds ratio; CI, confidence interval.

<sup>a</sup> Model included ZIP code per capita income, park use, park use by ZIP code median per capita income cross-product term, household occupancy, age and race/ethnicity
